# Supplementary material for: Neutron diffraction studies on the thermal expansion and anomalous mechanics in the perovskite-type [C(ND2)3]Me2+(DCOO)3 [Me = Cu, Mn, Co]
Source: Royal Society of Chemistry journal article supplement (doi:10.1039/c8cp01245h), 2018-01-01
Supplement: c8cp01245h1.pdf [file c8cp01245h1.pdf]

**Neutron diffraction studies on the thermal expansion and anomalous  
mechanics in the perovskite-type  $[\text{C}(\text{ND}_2)_3]\text{Me}^{2+}(\text{DCOO})_3$  [Me = Cu, Mn, Co]**

Supplementary information

M. Viswanathan

School of Physics and Astronomy, Queen Mary University of London,  
London E1 4NS, United Kingdom

E-mail: viswanathan.mohandoss@outlook.com; viswanathan@qmul.ac.uk

## Additional experimental information

MnGF single-crystals were grown by slow evaporation of the solution containing formic acid,  $[\text{C}(\text{NH}_2)_3]_2 \text{CO}_3$ , water and  $\text{Mn}(\text{ClO}_4)_2 \cdot 6\text{H}_2\text{O}$ , as described by Hu *et al.* [15].

The following deuterated materials were prepared by slightly modifying the method in reference [15], due to unavailability of the deuterated analogue of  $[\text{C}(\text{NH}_2)_3]_2 \text{CO}_3$ :

CuGF was prepared by dissolving dehydrated  $\text{CuSO}_4$ ,  $\text{C}(\text{ND}_2)_3\text{Cl}$ ,  $\text{K}_2\text{CO}_3$  and  $\text{DCOOD}$  in  $\text{D}_2\text{O}$ . Single-crystals were grown from slow evaporation of diluted solutions. CoGF/MnGF were synthesised in a similar fashion using the corresponding metal salts such as dehydrated  $\text{CoCl}_2$  and  $\text{MnCl}_2 \cdot \text{H}_2\text{O}$ , respectively.

**Table S1:** Some experimental details relating to data collection. <sup>H</sup> refers to a protonated sample, while the rest are deuterated. To convert proton beam charge to beamtime, the values may be divided by  $160 \mu\text{A}$ , assuming a stable beam throughout the experiment.

| Instrument       | Sample                    | Total proton beam charge in $\mu\text{A h}$ (per measurement) | Sample specifications                              | Additional details                            |
|------------------|---------------------------|---------------------------------------------------------------|----------------------------------------------------|-----------------------------------------------|
| SXD              | MnGF <sup>H</sup><br>CuGF | 400<br>200                                                    | $\sim 113 \text{ mm}^2$<br>$\sim 100 \text{ mm}^2$ | 1 crystal<br>1 crystal                        |
| WISH<br>(powder) | MnGF<br>CoGF<br>CuGF      | $\sim 13$ to $14$                                             | $\sim 1.2$ to $1.4 \text{ gm}$                     | Sample contained in 8mm diameter vanadium can |

On SXD, the samples were placed in a top loading closed cycle refrigerator. On WISH, vanadium can loaded with sample was placed in an Oxford instruments Variox cryostat.

## Rietveld refinement process

Structural parameters from single-crystal neutron diffraction data of CuGF and MnGF were used as the starting model. In the case of CuGF, 30 K data from SXD was used as a starting model for NPD from 40 to 290 K (upward) and 25 to 5 K (downward). For MnGF, 30 K data from SXD was used as a starting model for NPD from 50 to 200 K (upward) and 25 to 9 K (downward). In such cases, subsequent refinements were done with the former refinement as a guide to the next temperature. In the case of CoGF, initial refinement was done for the 275 K data. The structural parameters reported by Hu et. al. (single-crystal X-ray diffraction at 290 K) was used as a starting model. Further refinements were done consecutively, by employing the previous temperature as the starting model.

The following were the free variables in the refinements: (a) the lattice parameters; (b) the atomic coordinates; (c) a polynomial background function, (d) a scale factor; (e) peak shape parameters; and (f) displacement parameters (isotropic).

All the refinements were implemented with a TOF profile function 3 (in GSAS) featuring a convolution of back-to-back exponentials with a pseudo-Voigt function. Backgrounds were modelled using the shifted Chebyshev polynomials. Thermal parameters of like-atoms (except D) were refined with constraints set equal. The deuterium atoms have been divided into two categories “free from disorder” and “with disorder”. With each category treated independently from each other. Initial attempts of Rietveld refinement resulted in negative ADP values for certain atoms. Hence the interpolated values of ADP obtained from the SXD data were used and kept fixed for each temperature. Such a treatment was applied for Cu (CuGF), Mn and C in MnGF (also used in CoGF).

The Following soft restraints were implemented: (i) along the bonds: C-N, N-D, C-O, C-D; (ii) across the bonds: N-N, N-D, D-D, C-D, O-D, O-O. These implementations resulted in meaningful structural features and are comparable with results from single-crystal neutron diffraction.

**Table S2:** Rietveld refinement results of target compounds.

|                           | Copper guanidinium formate: [C(ND <sub>2</sub> ) <sub>3</sub> ]Cu(DCOO) <sub>3</sub> |                                             |                                             |                                             |
|---------------------------|--------------------------------------------------------------------------------------|---------------------------------------------|---------------------------------------------|---------------------------------------------|
| CCDC No.                  | 1839555                                                                              | 1839556                                     | 1839557                                     | 1839558                                     |
| T (K)                     | 25                                                                                   | 100                                         | 190                                         | 290                                         |
| Crystal system            | Orthorhombic                                                                         |                                             |                                             |                                             |
| Space group               | <i>Pna2<sub>1</sub></i>                                                              |                                             |                                             |                                             |
| <i>a, b, c</i> (Å)        | 8.42922(7),<br>9.03874(10),<br>11.29341(10)                                          | 8.44705(7),<br>9.03360(10),<br>11.30470(10) | 8.47827(7),<br>9.03192(10),<br>11.32571(10) | 8.51810(8),<br>9.03552(11),<br>11.35385(11) |
| <i>R<sub>p</sub></i> (%)  | 4.44                                                                                 | 4.16                                        | 3.87                                        | 3.55                                        |
| <i>wR<sub>p</sub></i> (%) | 4.82                                                                                 | 4.55                                        | 4.35                                        | 4.23                                        |

|                           | Manganese guanidinium formate: [C(ND <sub>2</sub> ) <sub>3</sub> ]Mn(DCOO) <sub>3</sub> |                                              |                                              |                                              |
|---------------------------|-----------------------------------------------------------------------------------------|----------------------------------------------|----------------------------------------------|----------------------------------------------|
| CCDC No.                  | 1839559                                                                                 | 1839560                                      | 1839561                                      | 1839562                                      |
| T (K)                     | 25                                                                                      | 75                                           | 125                                          | 200                                          |
| Crystal system            | Orthorhombic                                                                            |                                              |                                              |                                              |
| Space group               | <i>Pnna</i>                                                                             |                                              |                                              |                                              |
| <i>a, b, c</i> (Å)        | 8.42957(10),<br>11.89231(18),<br>9.09323(15)                                            | 8.44100(10),<br>11.90050(18),<br>9.08519(15) | 8.45544(11),<br>11.91319(19),<br>9.07778(16) | 8.47995(11),<br>11.93774(20),<br>9.06952(18) |
| <i>R<sub>p</sub></i> (%)  | 5.25                                                                                    | 5.28                                         | 5.26                                         | 5.53                                         |
| <i>wR<sub>p</sub></i> (%) | 5.63                                                                                    | 5.78                                         | 5.93                                         | 6.14                                         |

|                           | Cobalt guanidinium formate: [C(ND <sub>2</sub> ) <sub>3</sub> ]Co(DCOO) <sub>3</sub> |                                              |                                              |                                              |
|---------------------------|--------------------------------------------------------------------------------------|----------------------------------------------|----------------------------------------------|----------------------------------------------|
| CCDC No.                  | 1839563                                                                              | 1839564                                      | 1839565                                      | 1839566                                      |
| T (K)                     | 30                                                                                   | 100                                          | 200                                          | 275                                          |
| Crystal system            | Orthorhombic                                                                         |                                              |                                              |                                              |
| Space group               | <i>Pnna</i>                                                                          |                                              |                                              |                                              |
| <i>a, b, c</i> (Å)        | 8.26161(20),<br>11.68198(35),<br>8.92432(32)                                         | 8.27377(19),<br>11.69313(34),<br>8.91652(32) | 8.29786(19),<br>11.71840(34),<br>8.91122(33) | 8.31848(19),<br>11.74230(35),<br>8.90972(34) |
| <i>R<sub>p</sub></i> (%)  | 6.38                                                                                 | 6.37                                         | 6.25                                         | 6.09                                         |
| <i>wR<sub>p</sub></i> (%) | 7.61                                                                                 | 7.77                                         | 7.91                                         | 7.95                                         |

**Table S3:** Variable-temperature lattice parameter data for [C(ND<sub>2</sub>)<sub>3</sub>] Cu (DCOO)<sub>3</sub>

| Temperature (K) | <i>a</i> (Å) | $\sigma_a$ | <i>b</i> (Å) | $\sigma_b$ | <i>c</i> (Å) | $\sigma_c$ |
|-----------------|--------------|------------|--------------|------------|--------------|------------|
| 5               | 8.42887      | 0.00007    | 9.03903      | 0.00010    | 11.29293     | 0.00010    |
| 6               | 8.42884      | 0.00007    | 9.03905      | 0.00010    | 11.29297     | 0.00010    |
| 7               | 8.42886      | 0.00007    | 9.03910      | 0.00010    | 11.29295     | 0.00010    |
| 8               | 8.42883      | 0.00007    | 9.03908      | 0.00010    | 11.29297     | 0.00010    |
| 9               | 8.42888      | 0.00007    | 9.03904      | 0.00010    | 11.29298     | 0.00010    |
| 10              | 8.42886      | 0.00007    | 9.03906      | 0.00010    | 11.29296     | 0.00010    |
| 25              | 8.42922      | 0.00007    | 9.03874      | 0.00010    | 11.29341     | 0.00010    |
| 40              | 8.43082      | 0.00007    | 9.03789      | 0.00010    | 11.29443     | 0.00010    |
| 55              | 8.43337      | 0.00007    | 9.03691      | 0.00010    | 11.29606     | 0.00010    |
| 70              | 8.43668      | 0.00007    | 9.03577      | 0.00010    | 11.29819     | 0.00010    |
| 85              | 8.44070      | 0.00007    | 9.03479      | 0.00010    | 11.30068     | 0.00010    |
| 100             | 8.44705      | 0.00007    | 9.03360      | 0.00010    | 11.30470     | 0.00010    |
| 115             | 8.45079      | 0.00007    | 9.03307      | 0.00010    | 11.30707     | 0.00010    |
| 130             | 8.45544      | 0.00007    | 9.03259      | 0.00010    | 11.31014     | 0.00010    |
| 145             | 8.46057      | 0.00007    | 9.03216      | 0.00010    | 11.31355     | 0.00010    |
| 160             | 8.46909      | 0.00007    | 9.03183      | 0.00010    | 11.31922     | 0.00010    |
| 175             | 8.47342      | 0.00007    | 9.03179      | 0.00010    | 11.32230     | 0.00010    |
| 190             | 8.47827      | 0.00007    | 9.03192      | 0.00010    | 11.32571     | 0.00010    |
| 205             | 8.48368      | 0.00007    | 9.03214      | 0.00010    | 11.32955     | 0.00010    |
| 220             | 8.49119      | 0.00007    | 9.03265      | 0.00010    | 11.33486     | 0.00010    |
| 230             | 8.49473      | 0.00007    | 9.03287      | 0.00010    | 11.33730     | 0.00010    |
| 235             | 8.49704      | 0.00007    | 9.03310      | 0.00010    | 11.33896     | 0.00010    |
| 240             | 8.49927      | 0.00007    | 9.03331      | 0.00010    | 11.34056     | 0.00010    |
| 245             | 8.50140      | 0.00007    | 9.03351      | 0.00010    | 11.34210     | 0.00010    |
| 250             | 8.50481      | 0.00007    | 9.03385      | 0.00010    | 11.34452     | 0.00010    |
| 255             | 8.50631      | 0.00007    | 9.03407      | 0.00011    | 11.34552     | 0.00010    |
| 260             | 8.50792      | 0.00007    | 9.03424      | 0.00011    | 11.34666     | 0.00010    |
| 275             | 8.51261      | 0.00007    | 9.03477      | 0.00011    | 11.34997     | 0.00010    |
| 290             | 8.51810      | 0.00008    | 9.03552      | 0.00011    | 11.35385     | 0.00010    |

**Table S4:** Variable-temperature lattice parameter data for [C(ND<sub>2</sub>)<sub>3</sub>] Mn (DCOO)<sub>3</sub>

| Temperature (K) | <i>a</i> (Å) | $\sigma_a$ | <i>b</i> (Å) | $\sigma_b$ | <i>c</i> (Å) | $\sigma_c$ |
|-----------------|--------------|------------|--------------|------------|--------------|------------|
| 9               | 8.42810      | 0.00010    | 11.89148     | 0.00017    | 9.09439      | 0.00015    |
| 9.5             | 8.42814      | 0.00010    | 11.89151     | 0.00017    | 9.09439      | 0.00014    |
| 10              | 8.42816      | 0.00010    | 11.89150     | 0.00017    | 9.09443      | 0.00015    |
| 20              | 8.43775      | 0.00010    | 11.89777     | 0.00018    | 9.08746      | 0.00015    |
| 25              | 8.42957      | 0.00010    | 11.89231     | 0.00018    | 9.09323      | 0.00015    |
| 50              | 8.43503      | 0.00010    | 11.89581     | 0.00018    | 9.08910      | 0.00015    |
| 75              | 8.44100      | 0.00010    | 11.90050     | 0.00018    | 9.08519      | 0.00015    |
| 100             | 8.44783      | 0.00010    | 11.90631     | 0.00018    | 9.08134      | 0.00016    |
| 125             | 8.45544      | 0.00011    | 11.91319     | 0.00019    | 9.07778      | 0.00016    |
| 150             | 8.46366      | 0.00011    | 11.92118     | 0.00019    | 9.07455      | 0.00017    |
| 175             | 8.47239      | 0.00011    | 11.92993     | 0.00019    | 9.07167      | 0.00017    |
| 200             | 8.47995      | 0.00011    | 11.93774     | 0.00020    | 9.06952      | 0.00018    |

**Table S5:** Variable-temperature lattice parameter data for [C(ND<sub>2</sub>)<sub>3</sub>] Co (DCOO)<sub>3</sub>

| Temperature (K) | <i>a</i> (Å) | $\sigma_a$ | <i>b</i> (Å) | $\sigma_b$ | <i>c</i> (Å) | $\sigma_c$ |
|-----------------|--------------|------------|--------------|------------|--------------|------------|
| 14.5            | 8.26011      | 0.00020    | 11.68061     | 0.00035    | 8.9259       | 0.00032    |
| 15              | 8.26016      | 0.00020    | 11.68060     | 0.00035    | 8.92591      | 0.00032    |
| 30              | 8.26161      | 0.00020    | 11.68198     | 0.00035    | 8.92432      | 0.00032    |
| 45              | 8.26377      | 0.00020    | 11.68392     | 0.00035    | 8.92238      | 0.00032    |
| 75              | 8.26913      | 0.00020    | 11.68857     | 0.00034    | 8.91877      | 0.00032    |
| 100             | 8.27377      | 0.00019    | 11.69313     | 0.00034    | 8.91652      | 0.00032    |
| 125             | 8.27915      | 0.00019    | 11.69838     | 0.00034    | 8.91463      | 0.00032    |
| 150             | 8.28572      | 0.00019    | 11.70511     | 0.00034    | 8.91299      | 0.00033    |
| 175             | 8.29154      | 0.00019    | 11.71147     | 0.00034    | 8.91196      | 0.00033    |
| 200             | 8.29786      | 0.00019    | 11.71840     | 0.00034    | 8.91122      | 0.00033    |
| 225             | 8.30439      | 0.00019    | 11.72589     | 0.00034    | 8.91052      | 0.00033    |
| 250             | 8.31200      | 0.00019    | 11.73465     | 0.00035    | 8.90998      | 0.00034    |
| 275             | 8.31848      | 0.00019    | 11.74230     | 0.00035    | 8.90972      | 0.00034    |
